# Supplementary material for: Enhanced chemical sensing for Cu2+ based on composites of ZIF-8 with small molecules
Source: Royal Society of Chemistry journal article supplement (doi:10.1039/c9ra10695b), 2020-01-01
Supplement: c9ra10695b1.pdf [file c9ra10695b1.pdf]

## Electronic Supplementary Material

### Enhanced chemical sensing for Cu<sup>2+</sup> based on the composite of ZIF-8 with small molecule

*Jun Zhang\*, Xiuyang Zhao, Xuefeng Liu, Chuan Dong*

*Institute of Environmental Science, Shanxi University, Taiyuan 030006, PR China*

*\* Corresponding author. E-mail address: dc104@sxu.edu.cn (J. Zhang),*

*Fax: +86-0351-7011011*

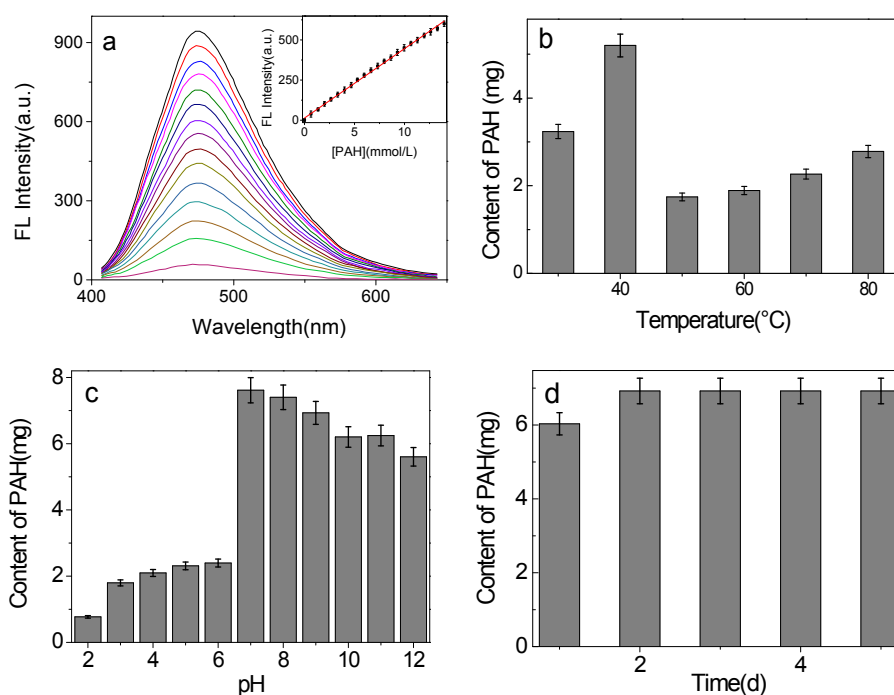

Fig. S1 (a) Fluorescence spectra of PAH at various concentrations, the impacts of reaction temperature (b), pH (c) and reaction time (d) on the content of PAH in ZIF-8.

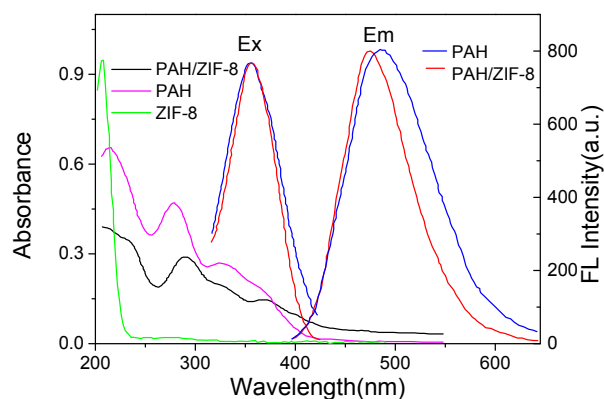

Fig. S2 UV-Vis spectra and fluorescence spectra of PAH/ZIF-8 and PAH.

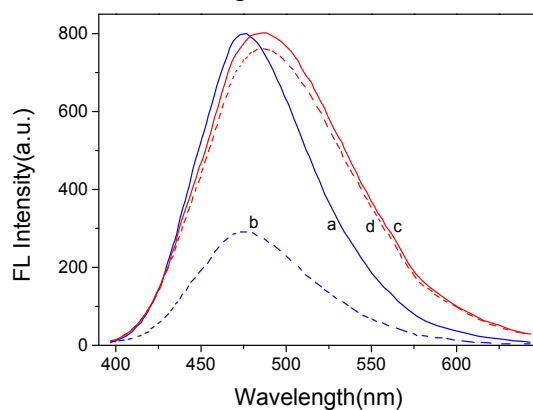

Fig. S3 the effects of the equal amount of  $\text{Cu}^{2+}$  on the fluorescence intensity of PAH/ZIF-8 and PAH (a. PAH/ZIF-8; b. PAH/ZIF-8 +  $\text{Cu}^{2+}$ ; c. PAH; d, PAH +  $\text{Cu}^{2+}$ )

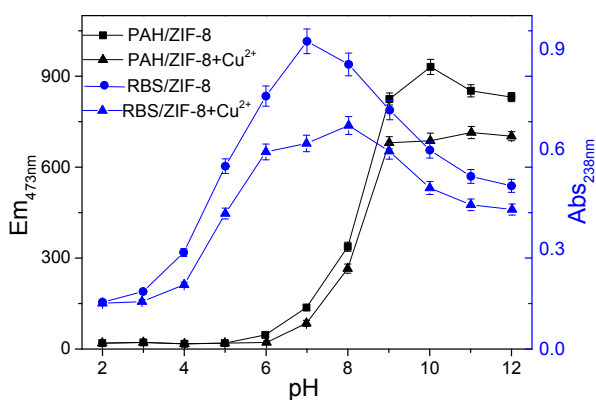

Fig. S4 Fluorescence responses of PAH/ZIF-8 and the UV-Vis absorption responses of RBS/ZIF-8 in the absence and presence of  $1.0 \mu\text{M}$   $\text{Cu}^{2+}$  at different pH values.

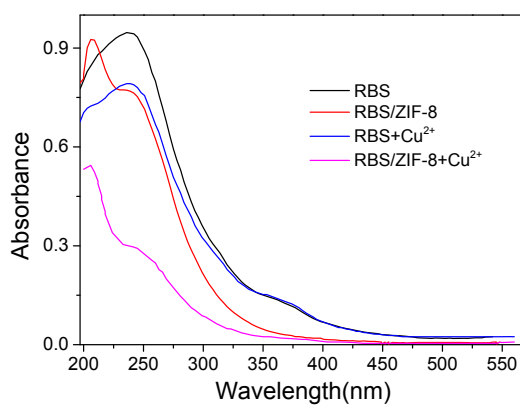

Fig. S5 UV-Vis spectra of RBS/ZIF-8 and RBS and their response to 1.0  $\mu\text{M}$   $\text{Cu}^{2+}$  in 40% ethanol aqueous solution.

Table S1 The surface area and pore structure of ZIF-8 and the two composites

| Material  | BET specific surface<br>( $\text{m}^2/\text{g}$ ) | Pore<br>volume( $\text{cm}^3/\text{g}$ ) | Average pore<br>diameter(nm) |
|-----------|---------------------------------------------------|------------------------------------------|------------------------------|
| ZIF-8     | 1264.95                                           | 0.66,                                    | 2.09                         |
| PAH@ZIF-8 | 865.27                                            | 0.48                                     | 3.57                         |
| RBS@ZIF-8 | 637.49                                            | 0.37                                     | 5.25                         |
